# Supplementary material for: Changing use of traditional healthcare amongst those dying of HIV related disease and TB in rural South Africa from 2003 – 2011: a retrospective cohort study
Source: PubMed Central journal article supplement (PMC4325963; doi:10.1186/1472-6882-14-504), 2014-12-17
Supplement: 12906_2014_2096_MOESM2_ESM.pdf [file 12906_2014_2096_MOESM2_ESM.pdf]

| Characteristic                                | Entire Population |               |                 |       | Study Population <sup>1</sup> |               |                 |       |              | Pearson<br>chitest<br>p value | ttest<br>absolute<br>difference<br>between<br>means | ttest<br>sample<br>mean <<br>population<br>mean | ttest<br>sample<br>mean ><br>population<br>mean |
|-----------------------------------------------|-------------------|---------------|-----------------|-------|-------------------------------|---------------|-----------------|-------|--------------|-------------------------------|-----------------------------------------------------|-------------------------------------------------|-------------------------------------------------|
|                                               | n                 | %             | (95% CI)        | Mean  | n                             | %             | (95% CI)        | Mean  | n (Expected) |                               |                                                     |                                                 |                                                 |
| <b>TOTAL</b>                                  | <b>6392</b>       | <b>100.00</b> |                 |       | <b>5929</b>                   | <b>100.00</b> |                 |       |              |                               |                                                     |                                                 |                                                 |
| <b>Gender</b>                                 |                   |               |                 |       |                               |               |                 |       |              |                               |                                                     |                                                 |                                                 |
| Female                                        | 3047              | 47.67         | (45.98 - 49.36) |       | 2831                          | 47.75         | (45.99 - 49.51) |       | 2826         | 0.897                         |                                                     |                                                 |                                                 |
| Male                                          | 3345              | 52.33         | (50.56 - 54.10) |       | 3098                          | 52.25         | (50.41 - 54.09) |       | 3103         |                               |                                                     |                                                 |                                                 |
| <b>Age at Death (years)</b>                   |                   |               |                 |       |                               |               |                 |       |              |                               |                                                     |                                                 |                                                 |
| 18 to 49                                      | 3571              | 55.87         | (54.03 - 57.70) | 49.76 | 3283                          | 55.37         | (53.48 - 57.27) | 50.04 | 3312         | 0.703                         | 0.279                                               | 0.861                                           | 0.139                                           |
| 50 to 65                                      | 1253              | 19.60         | (18.52 - 20.69) |       | 1167                          | 19.68         | (18.55 - 20.81) |       | 1162         |                               |                                                     |                                                 |                                                 |
| > 65                                          | 1568              | 24.53         | (23.32 - 25.74) |       | 1479                          | 24.95         | (23.67 - 26.22) |       | 1454         |                               |                                                     |                                                 |                                                 |
| <b>Country of Origin <sup>2</sup></b>         |                   |               |                 |       |                               |               |                 |       |              |                               |                                                     |                                                 |                                                 |
| Mozambique                                    | 1929              | 30.18         | (28.83 - 31.53) |       | 1823                          | 30.75         | (29.34 - 32.16) |       | 1789         | 0.629                         |                                                     |                                                 |                                                 |
| South Africa                                  | 4458              | 69.74         | (67.70 - 71.79) |       | 4101                          | 69.17         | (67.05 - 71.29) |       | 4135         |                               |                                                     |                                                 |                                                 |
| Unknown                                       | 5                 | 0.08          | (0.01 - 0.15)   |       | 5                             | 0.08          | (0.01 - 0.16)   |       | 5            |                               |                                                     |                                                 |                                                 |
| <b>Year of Death</b>                          |                   |               |                 |       |                               |               |                 |       |              |                               |                                                     |                                                 |                                                 |
| 2003 to 2005                                  | 1994              | 31.20         | (29.83 - 32.56) |       | 1781                          | 30.04         | (28.64 - 31.43) |       | 1850         | 0.094                         |                                                     |                                                 |                                                 |
| 2006 to 2008                                  | 2276              | 35.61         | (34.14 - 37.07) |       | 2115                          | 35.67         | (34.15 - 37.19) |       | 2111         |                               |                                                     |                                                 |                                                 |
| 2009 to 2011                                  | 2122              | 33.20         | (31.79 - 34.61) |       | 2033                          | 34.29         | (32.80 - 35.78) |       | 1968         |                               |                                                     |                                                 |                                                 |
| <b>Residence Status</b>                       |                   |               |                 |       |                               |               |                 |       |              |                               |                                                     |                                                 |                                                 |
| Temporary                                     | 1829              | 28.61         | (27.30 - 29.93) |       | 1629                          | 27.48         | (26.14 - 28.81) |       | 1697         | 0.103                         |                                                     |                                                 |                                                 |
| Permanent                                     | 4410              | 68.99         | (66.96 - 71.03) |       | 4166                          | 70.26         | (68.13 - 72.40) |       | 4091         |                               |                                                     |                                                 |                                                 |
| Unknown                                       | 153               | 2.39          | (2.01 - 2.77)   |       | 134                           | 2.26          | (1.88 - 2.64)   |       | 142          |                               |                                                     |                                                 |                                                 |
| <b>Individual Education (years completed)</b> |                   |               |                 |       |                               |               |                 |       |              |                               |                                                     |                                                 |                                                 |
| 0 to 5                                        | 3026              | 47.34         | (45.65 - 49.03) | 5.36  | 2845                          | 47.98         | (46.22 - 49.75) | 5.3   | 2807         | 0.934                         | 0.372                                               | 0.186                                           | 0.814                                           |
| 6 to 7                                        | 733               | 11.47         | (10.64 - 12.30) |       | 672                           | 11.33         | (10.48 - 12.19) |       | 680          |                               |                                                     |                                                 |                                                 |
| 8 to 9                                        | 667               | 10.43         | (9.64 - 11.23)  |       | 620                           | 10.46         | (9.63 - 11.28)  |       | 619          |                               |                                                     |                                                 |                                                 |
| 10 to 11                                      | 706               | 11.05         | (10.23 - 11.86) |       | 638                           | 10.76         | (9.93 - 11.60)  |       | 655          |                               |                                                     |                                                 |                                                 |
| > 11                                          | 1001              | 15.66         | (14.69 - 16.63) |       | 921                           | 15.53         | (14.53 - 16.54) |       | 928          |                               |                                                     |                                                 |                                                 |
| Unknown                                       | 259               | 4.05          | (3.56 - 4.55)   |       | 233                           | 3.93          | (3.43 - 4.43)   |       | 240          |                               |                                                     |                                                 |                                                 |

**Table S1 - Comparison of descriptive variables between the entire population of those dying between 2003 and 2011 in the Agincourt HDSS and the study population <sup>1</sup>**

<sup>1</sup> The study population comprises adults (aged over 18) who died in the Agincourt sub-district between 2003 and 2011 for whom healthcare utilisation data was available.

<sup>2</sup> South Africa indicates those born in South Africa, Mozambique represents those who either in-migrated from Mozambique or were the children of fathers in-migrating from Mozambique.

<sup>3</sup> SEP (socioeconomic position) quintiles are a measure of the level of asset ownership in a household. Quintile 1 includes the households with the lowest levels of asset ownership and quintile 5 those with the highest levels.

| Characteristic                                               | Entire Population |       |                 |       | Study Population <sup>1</sup> |       |                 |      |              | Pearson<br>chitest<br>p value | ttest<br>absolute<br>difference<br>between<br>means | ttest<br>sample<br>mean <<br>population<br>mean | ttest<br>sample<br>mean ><br>population<br>mean |
|--------------------------------------------------------------|-------------------|-------|-----------------|-------|-------------------------------|-------|-----------------|------|--------------|-------------------------------|-----------------------------------------------------|-------------------------------------------------|-------------------------------------------------|
|                                                              | n                 | %     | (95% CI)        | Mean  | n                             | %     | (95% CI)        | Mean | n (Expected) |                               |                                                     |                                                 |                                                 |
| <b>Household SEP quintile <sup>3</sup></b>                   |                   |       |                 |       |                               |       |                 |      |              |                               |                                                     |                                                 |                                                 |
| 1                                                            | 1230              | 19.24 | (18.17 - 20.32) |       | 1142                          | 19.26 | (18.14 - 20.38) |      | 1141         | 0.992                         |                                                     |                                                 |                                                 |
| 2                                                            | 1347              | 21.07 | (19.95 - 22.20) |       | 1249                          | 21.07 | (19.90 - 22.23) |      | 1249         |                               |                                                     |                                                 |                                                 |
| 3                                                            | 1220              | 19.09 | (18.02 - 20.16) |       | 1141                          | 19.24 | (18.13 - 20.36) |      | 1132         |                               |                                                     |                                                 |                                                 |
| 4                                                            | 1296              | 20.28 | (19.17 - 21.38) |       | 1205                          | 20.32 | (19.18 - 21.47) |      | 1202         |                               |                                                     |                                                 |                                                 |
| 5                                                            | 1225              | 19.16 | (18.09 - 20.24) |       | 1128                          | 19.03 | (17.91 - 20.14) |      | 1136         |                               |                                                     |                                                 |                                                 |
| Unknown                                                      | 74                | 1.16  | (0.89 - 1.42)   |       | 64                            | 1.08  | (0.81 - 1.34)   |      | 69           |                               |                                                     |                                                 |                                                 |
| <b>Distance to Nearest Clinic (km)</b>                       |                   |       |                 |       |                               |       |                 |      |              |                               |                                                     |                                                 |                                                 |
| 0 - 1                                                        | 2053              | 32.12 | (30.73 - 33.51) | 3.03  | 1925                          | 32.47 | (31.02 - 33.92) | 3.05 | 1904         | 0.735                         | 0.641                                               | 0.680                                           | 0.320                                           |
| 1 - 3                                                        | 1640              | 25.66 | (24.42 - 26.90) |       | 1497                          | 25.25 | (23.97 - 26.53) |      | 1521         |                               |                                                     |                                                 |                                                 |
| > 3                                                          | 2699              | 42.22 | (40.63 - 43.82) |       | 2507                          | 42.28 | (40.63 - 43.94) |      | 2503         |                               |                                                     |                                                 |                                                 |
| <b>Illness Duration (months)</b>                             |                   |       |                 |       |                               |       |                 |      |              |                               |                                                     |                                                 |                                                 |
| 0 to 1                                                       | 1934              | 30.26 | (28.91 - 31.61) | 8.06  | 1923                          | 32.43 | (30.98 - 33.88) | 8.05 | 1794         | < 0.001                       | 0.980                                               | 0.490                                           | 0.510                                           |
| > 1 to 2                                                     | 625               | 9.78  | (9.01 - 10.54)  |       | 621                           | 10.47 | (9.65 - 11.30)  |      | 580          |                               |                                                     |                                                 |                                                 |
| > 2 to 6                                                     | 1208              | 18.90 | (17.83 - 19.96) |       | 1195                          | 20.16 | (19.01 - 21.30) |      | 1120         |                               |                                                     |                                                 |                                                 |
| > 6 to 24                                                    | 1152              | 18.02 | (16.98 - 19.06) |       | 1142                          | 19.26 | (18.14 - 20.38) |      | 1069         |                               |                                                     |                                                 |                                                 |
| > 24                                                         | 283               | 4.43  | (3.91 - 4.94)   |       | 279                           | 4.71  | (4.15 - 5.26)   |      | 263          |                               |                                                     |                                                 |                                                 |
| Unknown                                                      | 1190              | 18.62 | (17.56 - 19.67) |       | 769                           | 12.97 | (12.05 - 13.89) |      | 1104         |                               |                                                     |                                                 |                                                 |
| <b>Previous Mortality Rate at Residence (deaths/1000 PY)</b> |                   |       |                 |       |                               |       |                 |      |              |                               |                                                     |                                                 |                                                 |
| 0                                                            | 3093              | 48.39 | (46.68 - 50.09) | 10.12 | 2872                          | 48.44 | (46.67 - 50.21) | 9.85 | 2869         | 0.905                         | 0.378                                               | 0.188                                           | 0.812                                           |
| > 0 - 10                                                     | 1320              | 20.65 | (19.54 - 21.76) |       | 1243                          | 20.96 | (19.80 - 22.13) |      | 1224         |                               |                                                     |                                                 |                                                 |
| > 10 - 20                                                    | 1071              | 16.76 | (15.75 - 17.76) |       | 985                           | 16.61 | (15.58 - 17.65) |      | 993          |                               |                                                     |                                                 |                                                 |
| > 20                                                         | 908               | 14.21 | (13.28 - 15.13) |       | 829                           | 13.98 | (13.03 - 14.93) |      | 842          |                               |                                                     |                                                 |                                                 |
| <b>Cause of Death</b>                                        |                   |       |                 |       |                               |       |                 |      |              |                               |                                                     |                                                 |                                                 |
| AIDS/TB                                                      | 2930              | 45.84 | (44.18 - 47.50) |       | 2833                          | 47.78 | (46.02 - 49.54) |      | 2718         | < 0.001                       |                                                     |                                                 |                                                 |
| Other                                                        | 2430              | 38.02 | (36.50 - 39.53) |       | 2409                          | 40.63 | (39.01 - 42.25) |      | 2254         |                               |                                                     |                                                 |                                                 |
| External                                                     | 378               | 5.91  | (5.32 - 6.51)   |       | 362                           | 6.11  | (5.48 - 6.73)   |      | 351          |                               |                                                     |                                                 |                                                 |
| Unknown                                                      | 654               | 10.23 | (9.45 - 11.02)  |       | 325                           | 5.48  | (4.89 - 6.08)   |      | 607          |                               |                                                     |                                                 |                                                 |

**Table S1 - Comparison of descriptive variables between the entire population of those dying between 2003 and 2011 in the Agincourt HDSS and the study population <sup>1</sup>**

<sup>1</sup> The study population comprises adults (aged over 18) who died in the Agincourt sub-district between 2003 and 2011 for whom healthcare utilisation data was available.

<sup>2</sup> South Africa indicates those born in South Africa, Mozambique represents those who either in-migrated from Mozambique or were the children of fathers in-migrating from Mozambique.

<sup>3</sup> SEP (socioeconomic position) quintiles are a measure of the level of asset ownership in a household. Quintile 1 includes the households with the lowest levels of asset ownership and quintile 5 those with the highest levels.

| Year of Death       | HIV/TB                                                    |             |             |                      | Other Causes                                              |             |             |                      | p value<br>(difference<br>between<br>percentages) |
|---------------------|-----------------------------------------------------------|-------------|-------------|----------------------|-----------------------------------------------------------|-------------|-------------|----------------------|---------------------------------------------------|
|                     | Any use of<br>traditional or<br>herbal<br>remedies<br>(N) | Total       | %           | 95 % CI              | Any use of<br>traditional<br>or herbal<br>remedies<br>(N) | Total       | %           | 95 % CI              |                                                   |
| <b>2003 to 2005</b> | 759                                                       | 979         | 77.5        | (75.4 - 80.6)        | 319                                                       | 595         | 53.6        | ( 50.0 - 58.0)       | < 0.001                                           |
| <b>2006 to 2008</b> | 645                                                       | 1067        | 60.4        | (57.1 - 62.9)        | 328                                                       | 795         | 41.3        | (37.6 - 44.4)        | <0.001                                            |
| <b>2009 to 2011</b> | 303                                                       | 787         | 38.5        | (35.6 - 42.4)        | 240                                                       | 1019        | 23.6        | (21.4 - 26.6)        | <0.001                                            |
| <b>Totals</b>       | <b>1707</b>                                               | <b>2833</b> | <b>60.3</b> | <b>(58.2 - 61.8)</b> | <b>887</b>                                                | <b>2409</b> | <b>36.8</b> | <b>(35.1 - 38.9)</b> | <b>&lt;0.001</b>                                  |

**Table S2 - Percentages of adults (aged over 18) who died in the Agincourt sub-district between 2003 and 2011 for whom healthcare utilisation data was available making any use of traditional or herbal treatment during the final illness**

| Year of Death       | HIV/TB                                                                                    |             |             |                      | Other Causes                                                                              |             |             |                      | p value<br>(difference<br>between<br>percentages) |
|---------------------|-------------------------------------------------------------------------------------------|-------------|-------------|----------------------|-------------------------------------------------------------------------------------------|-------------|-------------|----------------------|---------------------------------------------------|
|                     | Use of<br>traditional or<br>herbal<br>remedies as<br>the first<br>source of<br>healthcare | Total       | %           | 95 % CI              | Use of<br>traditional<br>or herbal<br>remedies as<br>the first<br>source of<br>healthcare | Total       | %           | 95 % CI              |                                                   |
| <b>2003 to 2005</b> | 228                                                                                       | 979         | 23.3        | (20.4 - 25.6)        | 126                                                                                       | 595         | 21.2        | (17.7 - 24.3)        | 0.355                                             |
| <b>2006 to 2008</b> | 258                                                                                       | 1067        | 24.2        | (21.4 - 26.6)        | 147                                                                                       | 795         | 18.5        | (15.3 - 20.7)        | 0.002                                             |
| <b>2009 to 2011</b> | 118                                                                                       | 787         | 15.0        | (12.5 - 17.5)        | 144                                                                                       | 1019        | 14.1        | (11.9 - 16.1)        | 0.549                                             |
| <b>Totals</b>       | <b>604</b>                                                                                | <b>2833</b> | <b>21.3</b> | <b>(19.5 - 22.5)</b> | <b>417</b>                                                                                | <b>2409</b> | <b>17.3</b> | <b>(15.5 - 18.5)</b> | <b>&lt;0.001</b>                                  |

**Table S3 - Percentages of adults (aged over 18) who died in the Agincourt sub-district between 2003 and 2011 for whom healthcare utilisation data was available using traditional or herbal treatment as the first source of healthcare for the final illness**

| Year of Death       | HIV/TB                                                        |             |             |                      | Other Causes                                                  |             |             |                      | p value<br>(difference<br>between<br>percentages) |
|---------------------|---------------------------------------------------------------|-------------|-------------|----------------------|---------------------------------------------------------------|-------------|-------------|----------------------|---------------------------------------------------|
|                     | Use of both<br>traditional<br>and<br>biomedical<br>treatments | Total       | %           | 95 % CI              | Use of both<br>traditional<br>and<br>biomedical<br>treatments | Total       | %           | 95 % CI              |                                                   |
| <b>2003 to 2005</b> | 690                                                           | 979         | 70.5        | (67.1 - 72.8)        | 258                                                           | 595         | 43.4        | (39.0 - 47.0)        | <0.001                                            |
| <b>2006 to 2008</b> | 622                                                           | 1067        | 58.3        | (55.0 - 61.0)        | 293                                                           | 795         | 36.9        | (33.6 - 40.4)        | <0.001                                            |
| <b>2009 to 2011</b> | 253                                                           | 787         | 32.1        | (28.7 - 35.3)        | 170                                                           | 1019        | 16.7        | (14.7 - 19.3)        | <0.001                                            |
| <b>Totals</b>       | <b>1565</b>                                                   | <b>2833</b> | <b>55.2</b> | <b>(53.2 - 56.8)</b> | <b>721</b>                                                    | <b>2409</b> | <b>29.9</b> | <b>(28.2 - 31.8)</b> | <b>&lt;0.001</b>                                  |

**Table S4 - Percentages of adults (aged over 18) who died in the Agincourt sub-district between 2003 and 2011 for whom healthcare utilisation data was available using traditional or herbal and biomedical treatments during the final illness**

| Year of Death       | HIV/TB                                  |             |             |                      | Other Causes                            |             |             |                      | p value<br>(difference<br>between<br>percentages) |
|---------------------|-----------------------------------------|-------------|-------------|----------------------|-----------------------------------------|-------------|-------------|----------------------|---------------------------------------------------|
|                     | Use of only<br>biomedical<br>treatments | Total       | %           | 95 % CI              | Use of only<br>biomedical<br>treatments | Total       | %           | 95 % CI              |                                                   |
| <b>2003 to 2005</b> | 178                                     | 979         | 18.2        | (15.5 - 20.4)        | 162                                     | 595         | 27.2        | (23.4 - 30.6)        | < 0.001                                           |
| <b>2006 to 2008</b> | 391                                     | 1067        | 36.6        | (34.1 - 39.9)        | 353                                     | 795         | 44.4        | (40.5 - 47.5)        | 0.002                                             |
| <b>2009 to 2011</b> | 393                                     | 787         | 49.9        | (46.5 - 53.5)        | 462                                     | 1019        | 45.3        | (41.9 - 48.1)        | 0.035                                             |
| <b>Totals</b>       | <b>962</b>                              | <b>2833</b> | <b>34.0</b> | <b>(32.3 - 35.7)</b> | <b>977</b>                              | <b>2409</b> | <b>40.6</b> | <b>(39.0 - 43.0)</b> | <b>&lt;0.001</b>                                  |

**Table S5 - Percentages of adults (aged over 18) who died in the Agincourt sub-district between 2003 and 2011 for whom healthcare utilisation data was available using only biomedical treatments during the final illness**
